# Supplementary material
Source: PubMed Central journal article supplement (PMC3887464)
Supplement: Supp_Data.pdf [file Supp_Data.pdf]

## Supplementary Data

### Supplementary Methods and Materials

#### Measurement of monoamine oxidase activity

Cardiac monoamine oxidase (MAO)-A and -B activity (expressed as nmol per 20 min per milligram of protein) was determined by use of  $^{14}\text{C}$  labeled serotonin (5-HT) and  $^{14}\text{C}$  labeled  $\beta$ -phenylethylamine as substrates, respectively. Assays were performed as previously described (1).

#### RT-PCR and real-time RT-PCR

RNA was isolated from left ventricle tissue and reversely transcribed using commercially available kits (Qiagen, In-

vitrogen). cDNA was subjected to real time PCR amplification (Abi Prism 7000 Detection System; Applied Biosystems) using SYBR Green dye (Applied Biosystems). Primer sets for the specific target genes were designed to span one or more introns (IDT Technologies).

### Supplementary Reference

1. Chen K, Wu HF, and Shih JC. Influence of C terminus on monoamine oxidase A and B catalytic activity. *J Neurochem* 66: 797–803, 1996.

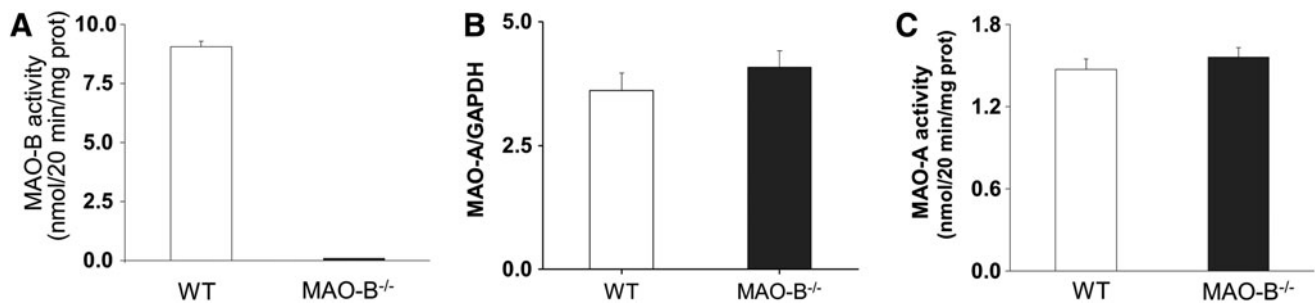

**SUPPLEMENTARY FIG. S1. MAO-B and MAO-A activity in MAO-B<sup>-/-</sup> mice. (A)** *In vitro* activity of MAO-B in WT and MAO-B<sup>-/-</sup> cardiac tissue. **(B)** MAO-A gene expression normalized to GAPDH and **(C)** MAO-A activity measured in hearts from WT and MAO-B<sup>-/-</sup> mice. MAO, monoamine oxidase; WT, wild type.

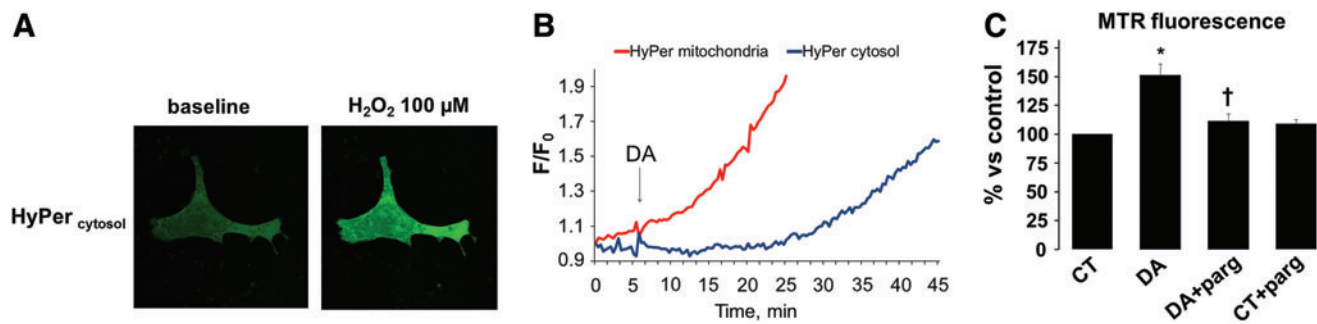

**SUPPLEMENTARY FIG. S2. H<sub>2</sub>O<sub>2</sub> generation following MAO activation occurs early and predominantly in the mitochondria.** (A) Distribution pattern and fluorescence intensity of cytosol-targeted HyPer in neonatal cardiomyocytes at baseline and after exogenous H<sub>2</sub>O<sub>2</sub> addition. (B) Time course for H<sub>2</sub>O<sub>2</sub> formation between mitochondria and cytosol upon MAO activity stimulation with DA. (C) Increase in mitochondrial reactive oxygen species generation upon MAO-B stimulation is also detectable with Mitotracker Red CM-H<sub>2</sub>XRos. \**p* < 0.005 versus CT, †*p* < 0.05 versus DA. DA, dopamine; F/F<sub>0</sub>, fluorescence intensity relative to resting fluorescence. To see this illustration in color, the reader is referred to the web version of this article at [www.liebertpub.com/ars](http://www.liebertpub.com/ars)

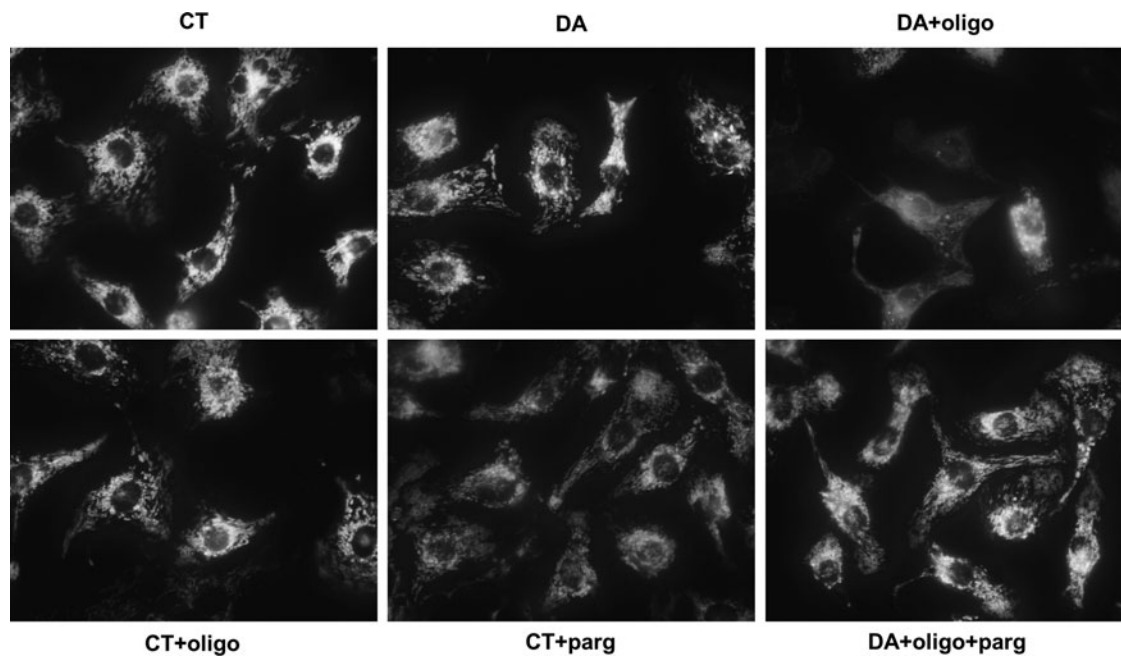

**SUPPLEMENTARY FIG. S3.** Representative images for TMRM staining in neonatal cardiomyocytes after 3 h of incubation with DA, oligomycin and without or with pargyline. CT, control; oligo, oligomycin; parg, pargyline; TMRM, tetramethylrhodamine methyl ester.
